# Supplementary material for: Hybrid photoluminescent material from lanthanide fluoride and graphene oxide with strong luminescence intensity as a chemical sensor for mercury ions
Source: Royal Society of Chemistry journal article supplement (doi:10.1039/d2nj00250g), 2022-01-01
Supplement: d2nj00250g1.pdf [file d2nj00250g1.pdf]

**Hybrid photoluminescent material of lanthanide fluoride and graphene oxide with  
stronger luminescence intensity as chemical sensor of mercury ion**

Richa Singhaal, Lobzang Tashi, Swaita Devi, Haq Nawaz Sheikh\*

<sup>a</sup>Department of Chemistry, University of Jammu, Baba Sahib Ambedkar Road, Jammu-  
180006, India

**(Supplementary Information)**

**Table of Contents**

| <b>CONTENTS</b>                                                                              | <b>Pages</b> |
|----------------------------------------------------------------------------------------------|--------------|
| 1. TEM micrograph.....                                                                       | S2           |
| 2. FT-IR spectra.....                                                                        | S3-S5        |
| 3. Energy transfer diagram.....                                                              | S6           |
| 4. Life time decay curve .....                                                               | S7-S8        |
| 5. Photoluminescence emission responses of hybrid material with different metal<br>ions..... | S9-S12       |
| 6. Quenching efficiency .....                                                                | S13          |
| 7. Life time decay curve of nanosensor in presence of different metal ions.....              | S14          |
| 8. PL emission spectra showing interference with different metals ions.....                  | S15-S19      |

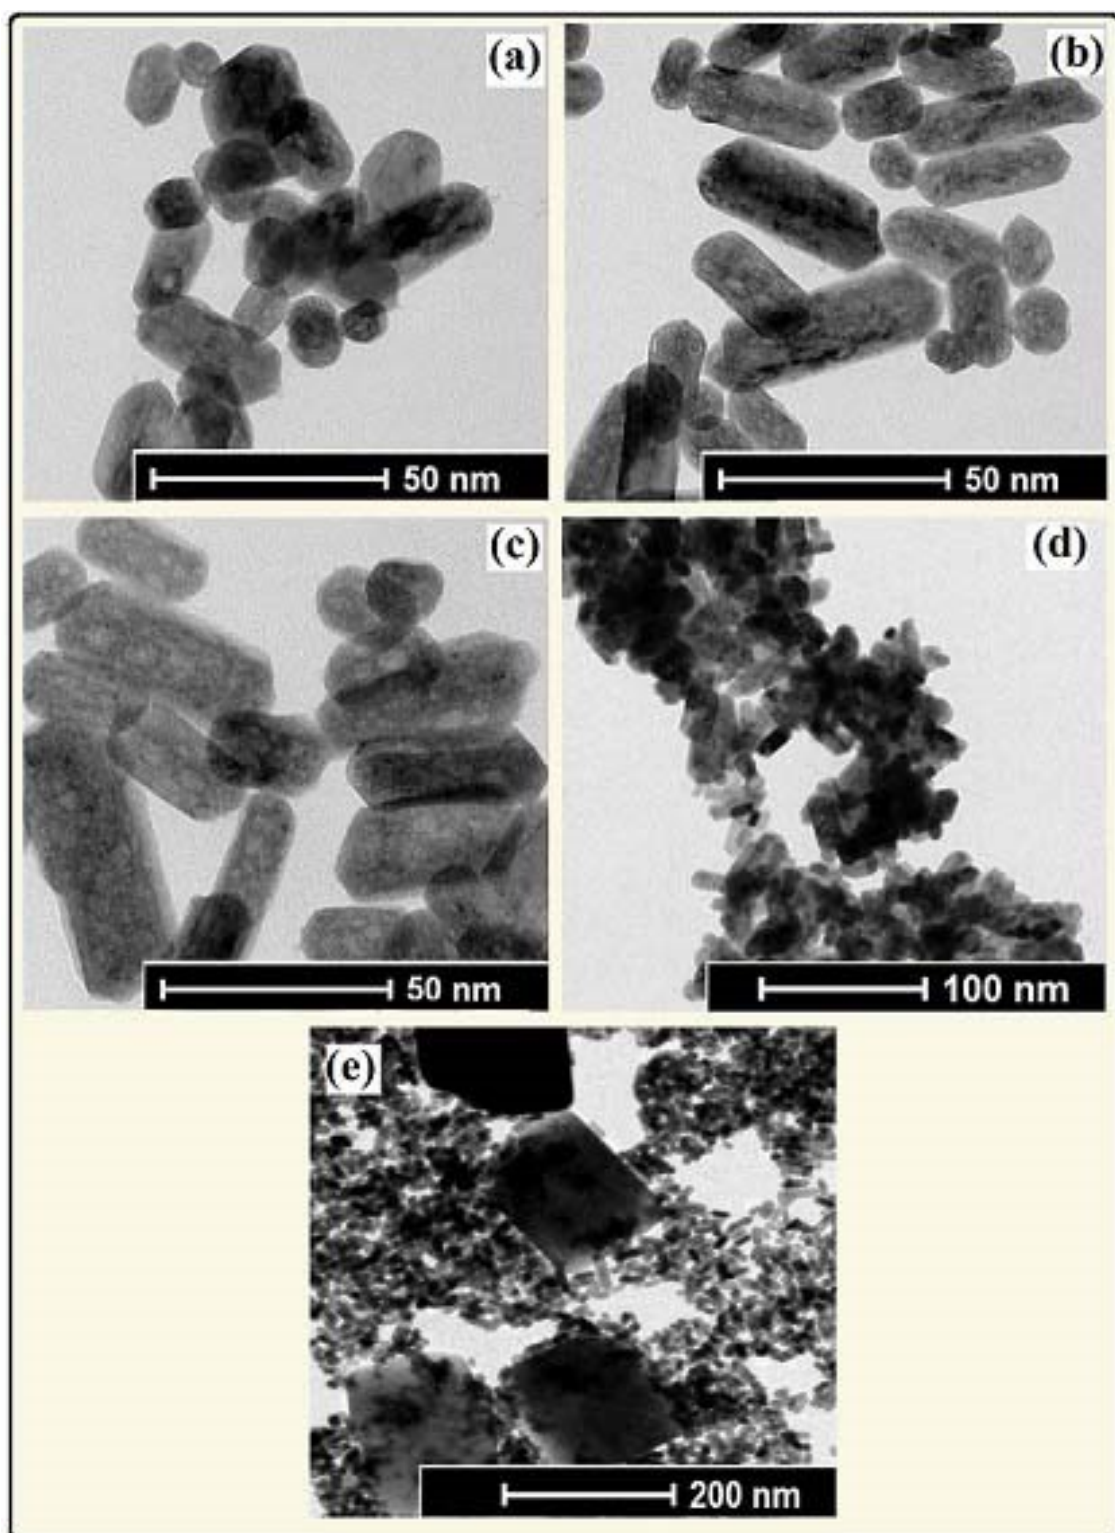

**Fig. S1†:** ESI TEM micrographs depicting the variations in the morphology of  $\text{Na}_x\text{Li}_y\text{GdF}_4:\text{Tb}^{3+}$  nanoparticles at different Li/Na ions concentrations: where  $x/y =$  (a)  $x=15$  mmol  $y=0$  mmol (b)  $x=10$  mmol,  $y=5$  mmol (c)  $x=7.5$  mmol  $y=7.5$  mmol (d)  $x=5$  mmol,  $y=10$  mmol (e)  $x=0$  mmol,  $y=15$  mmol.

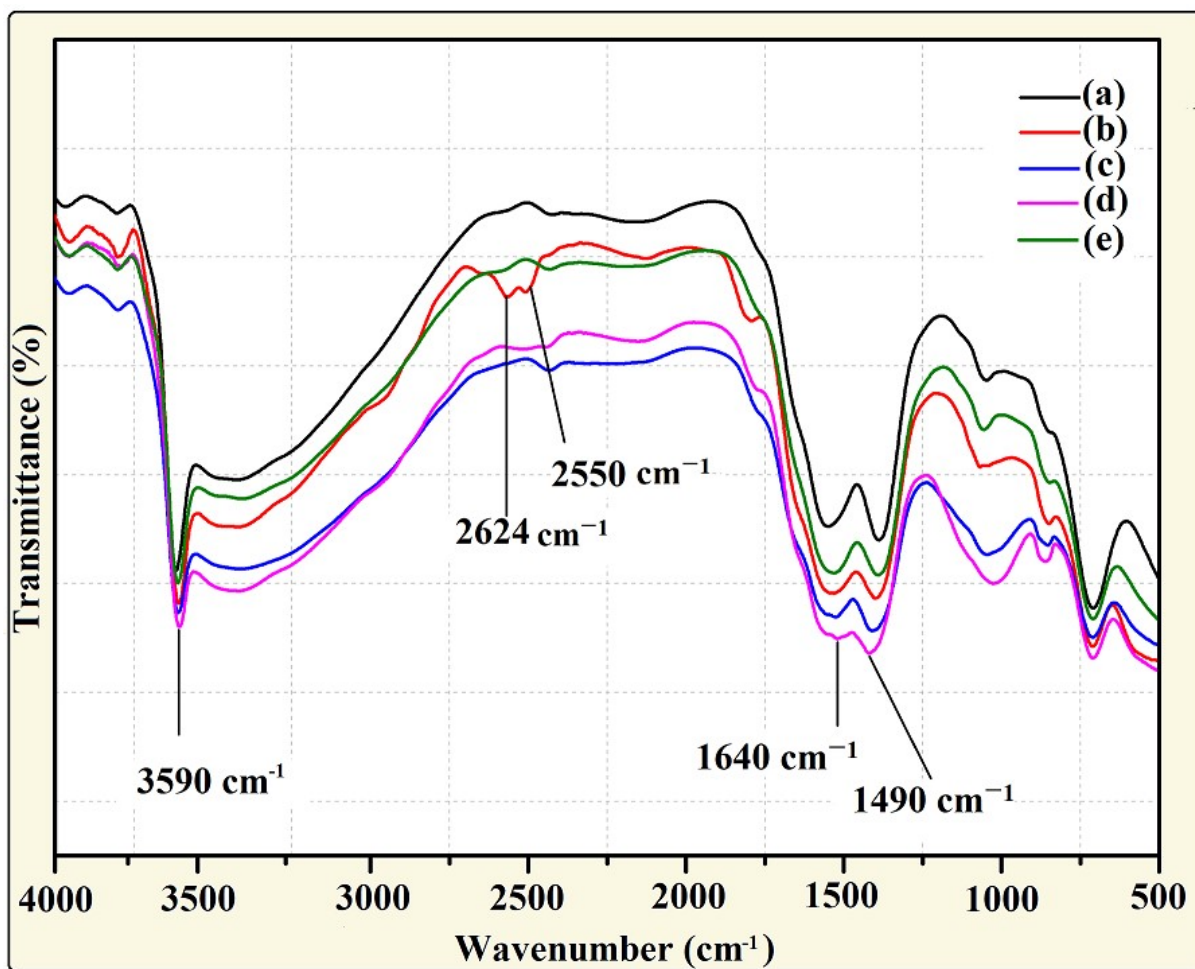

**Fig. S2†:** ESI FT-IR spectra visualizing the effect of different Na/Li ions concentrations on the  $\text{Na}_x\text{Li}_y\text{GdF}_4:\text{Tb}^{3+}$  nanophosphors (a)  $x=15$  mmol  $y=0$  mmol (b)  $x=10$  mmol,  $y=5$  mmol (c)  $x=7.5$  mmol  $y=7.5$  mmol (d)  $x=5$  mmol,  $y=10$  mmol (e)  $x=0$  mmol,  $y=15$  mmol

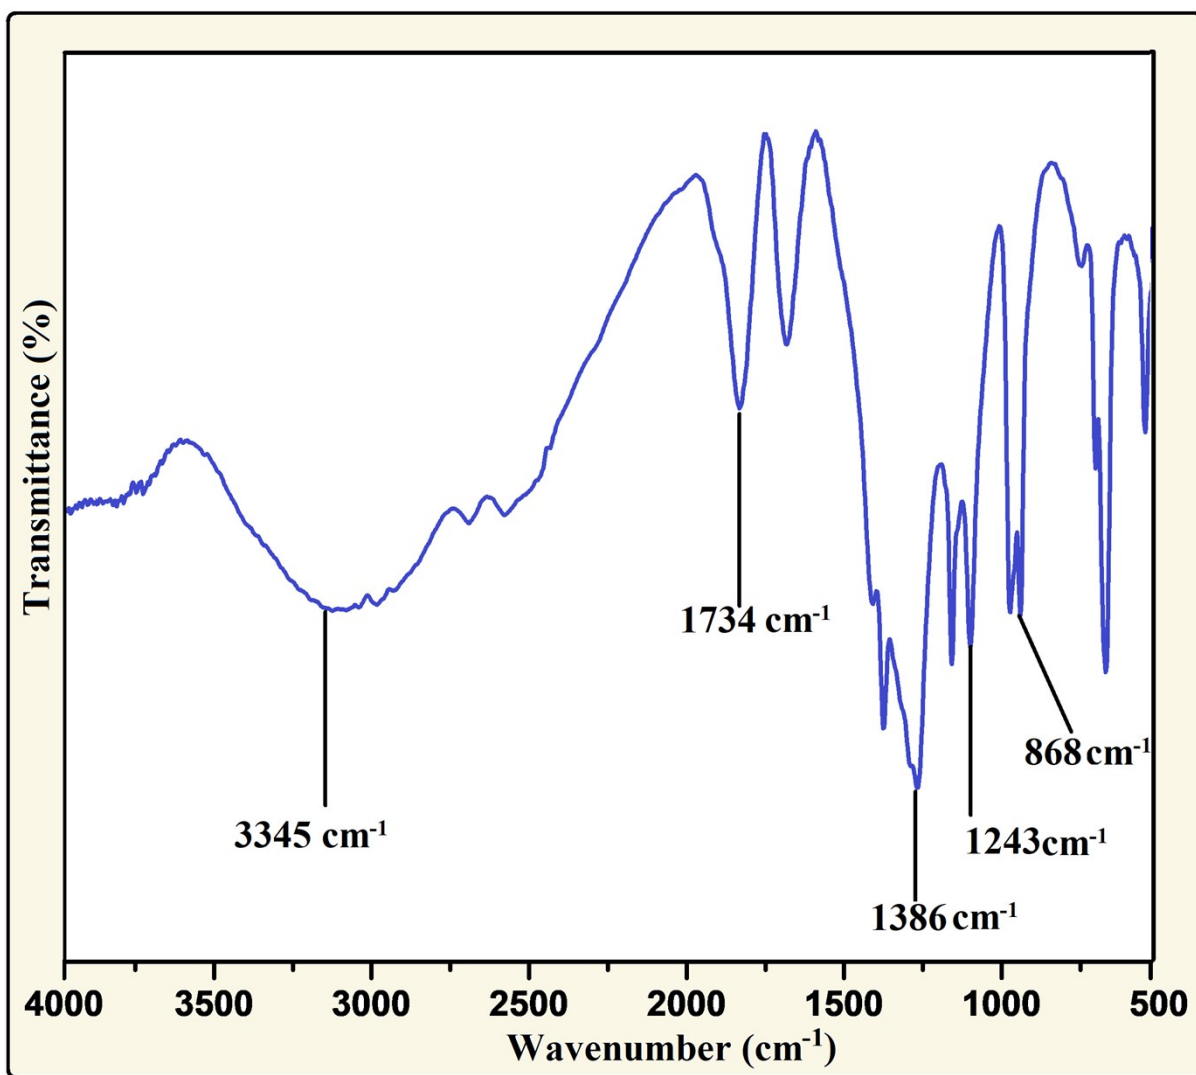

Fig. S3†: ESI FT-IR spectra of synthesized graphene oxide (GOSs)

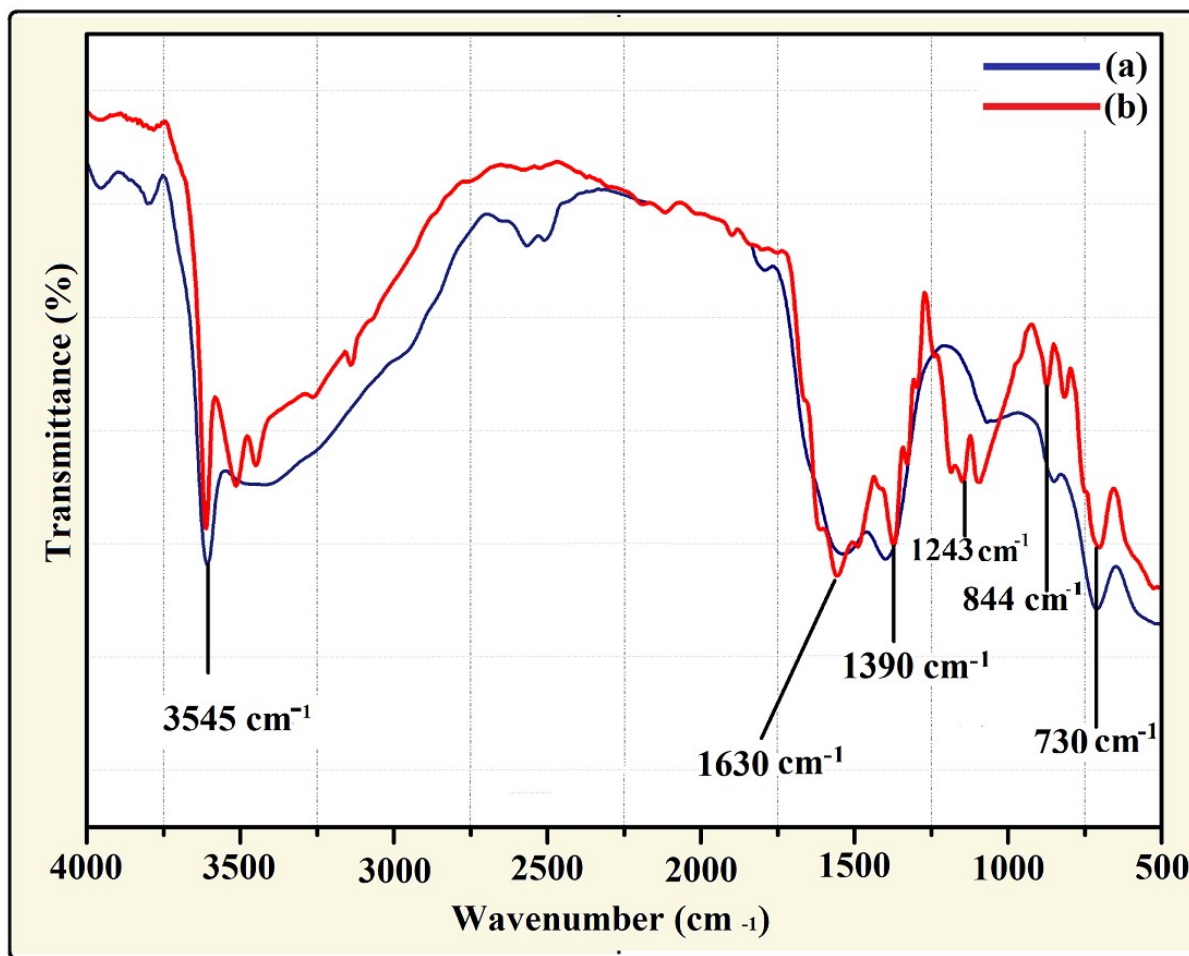

**Fig. S4†:** ESI FT-IR images displaying the presence of different functional groups attached to the synthesized nanostructure. **(a)**  $\text{Na}_{10}\text{Li}_5\text{GdF}_4:\text{Tb}^{3+}$  nanophosphors.

**(b)**  $\text{Na}_{10}\text{Li}_5\text{GdF}_4:\text{Tb}^{3+}@\text{PMA}@\text{Phen}@\text{GO}$ .

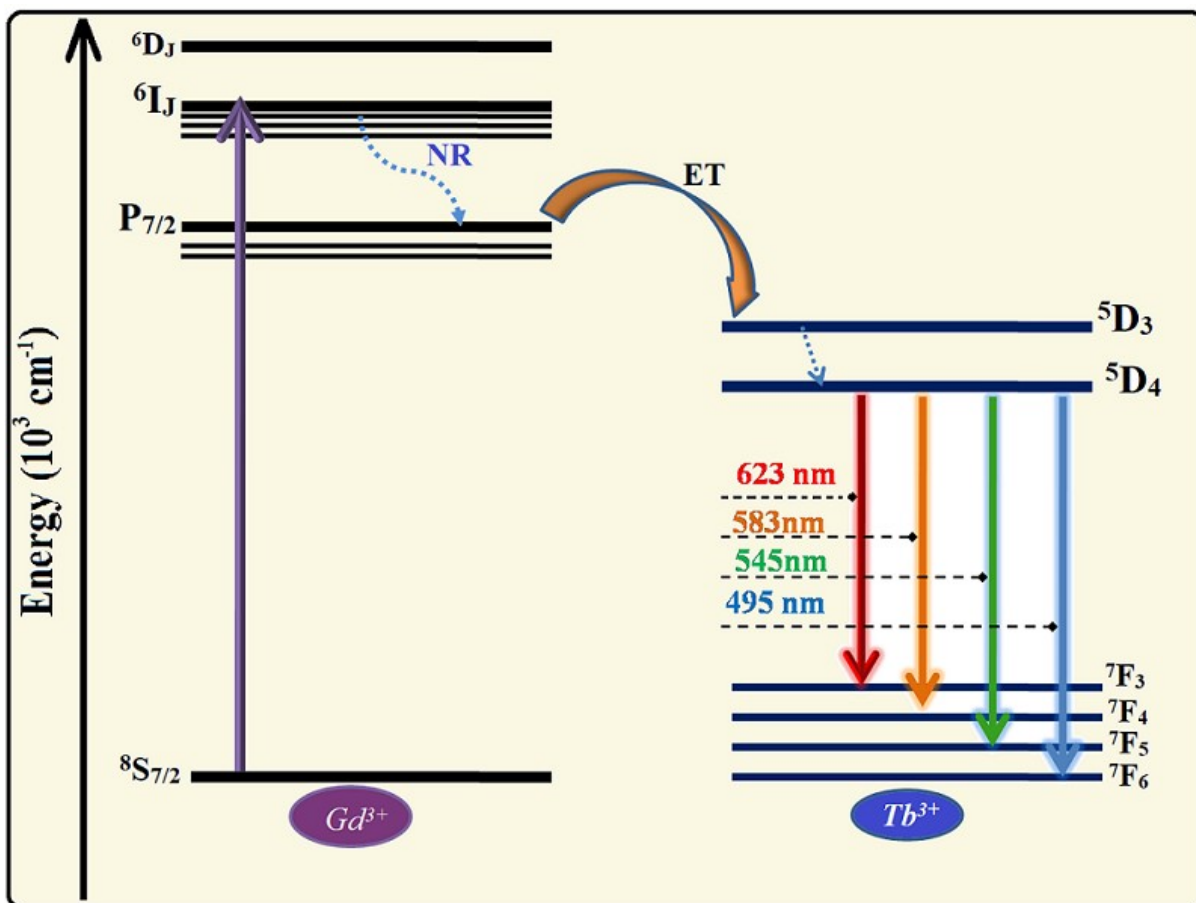

**Fig. S5†:** ESI Energy level diagram of as-synthesized  $Na_xLi_yGdF_4:Tb^{3+}$  nanophosphors showing efficient energy transfer from  $Gd^{3+}$  to  $Tb^{3+}$  ions

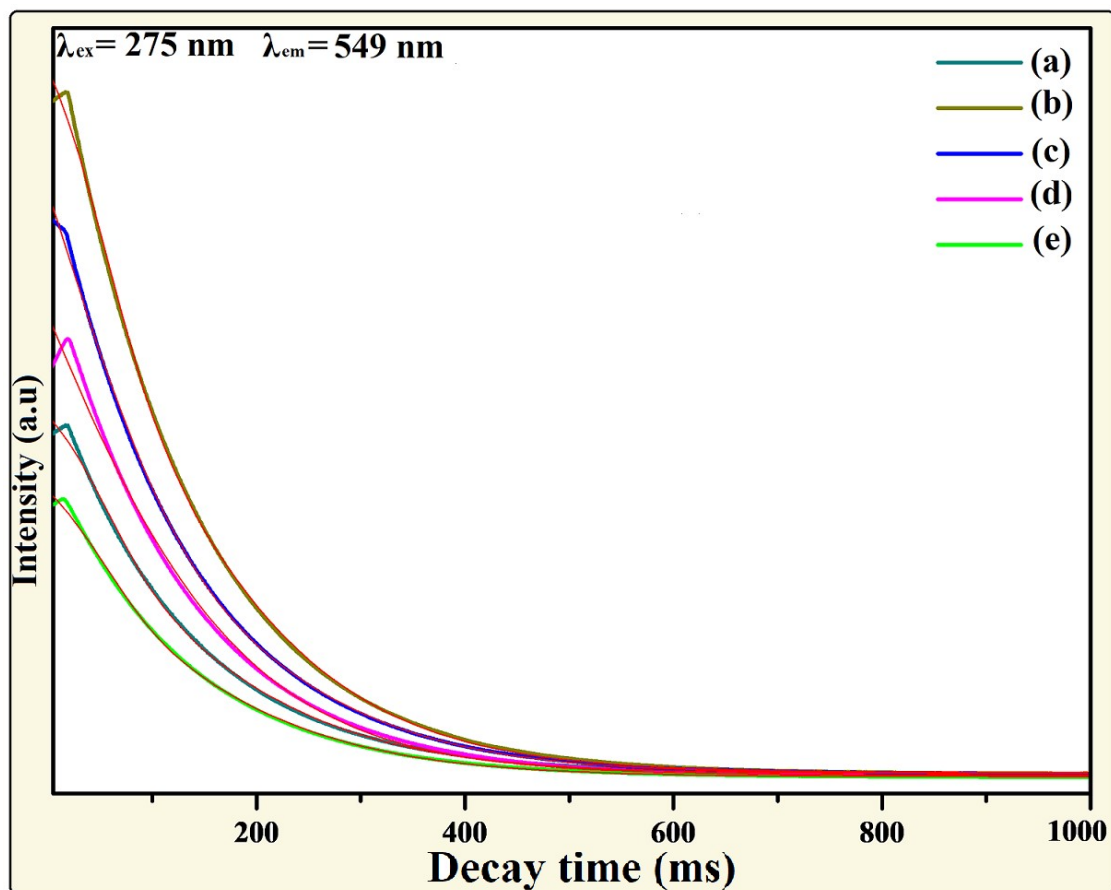

**Fig. S6†:** ESI Lifetime decay curve of as synthesized  $\text{Na}_x\text{Li}_y\text{GdF}_4:\text{Tb}^{3+}$  nanophosphors at varying Na/Li ions concentrations (a)  $x=10 \text{ mmol}$   $y= 5 \text{ mmol}$  (b)  $x=5 \text{ mmol}$ ,  $y=10 \text{ mmol}$  (c)  $x=7.5 \text{ mmol}$   $y=7.5\text{mmol}$  (d)  $x=15\text{mmol}$ ,  $y=0 \text{ mmol}$  (e)  $x=0 \text{ mmol}$ ,  $y=15\text{mmol}$ .

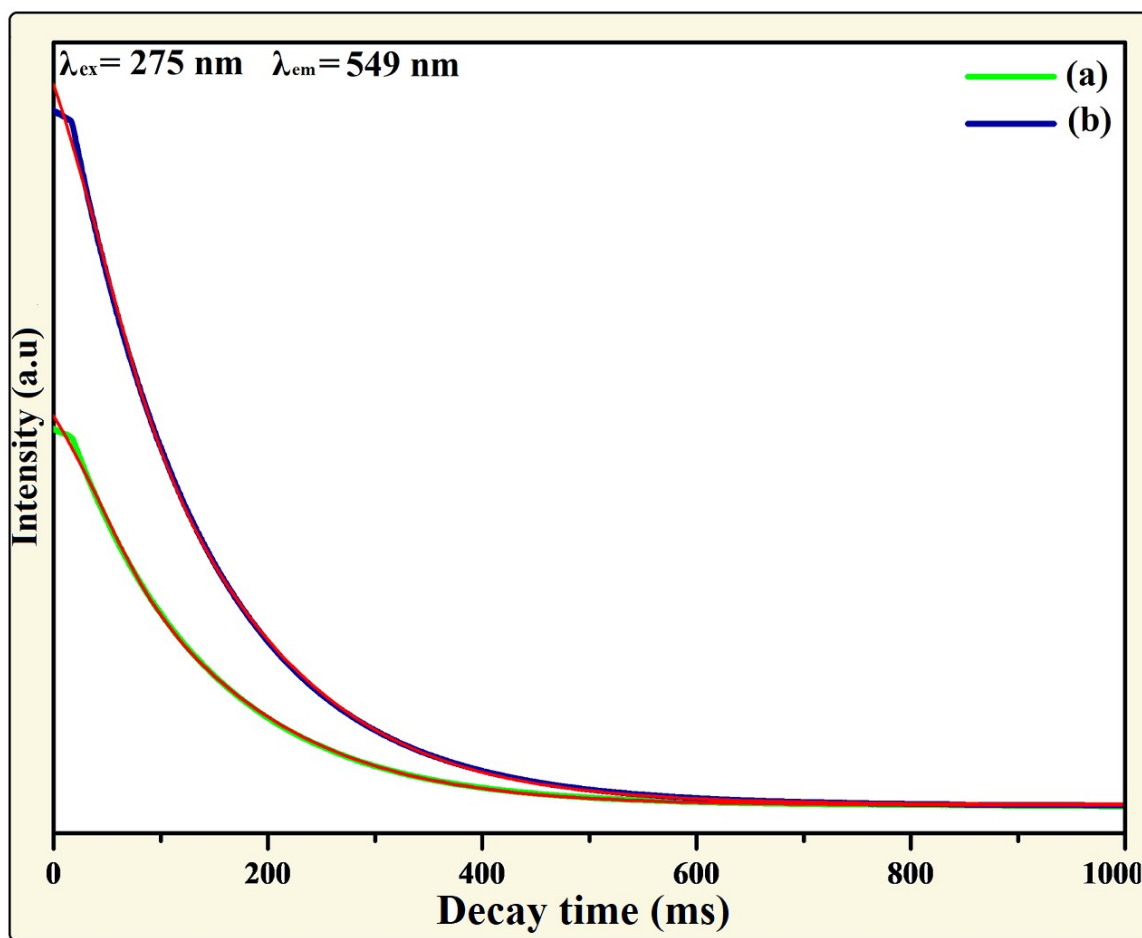

**Fig. S7†:** ESI Photoluminescence lifetime decay curves of as synthesized nanostructure  
(a)  $\text{Na}_x\text{Li}_y\text{GdF}_4:\text{Tb}^{3+}$  nanophosphors.  
(b)  $\text{Na}_x\text{Li}_y\text{GdF}_4:\text{Tb}^{3+}@\text{PMA}@\text{Phen}@\text{GO}$  nanocomposite.



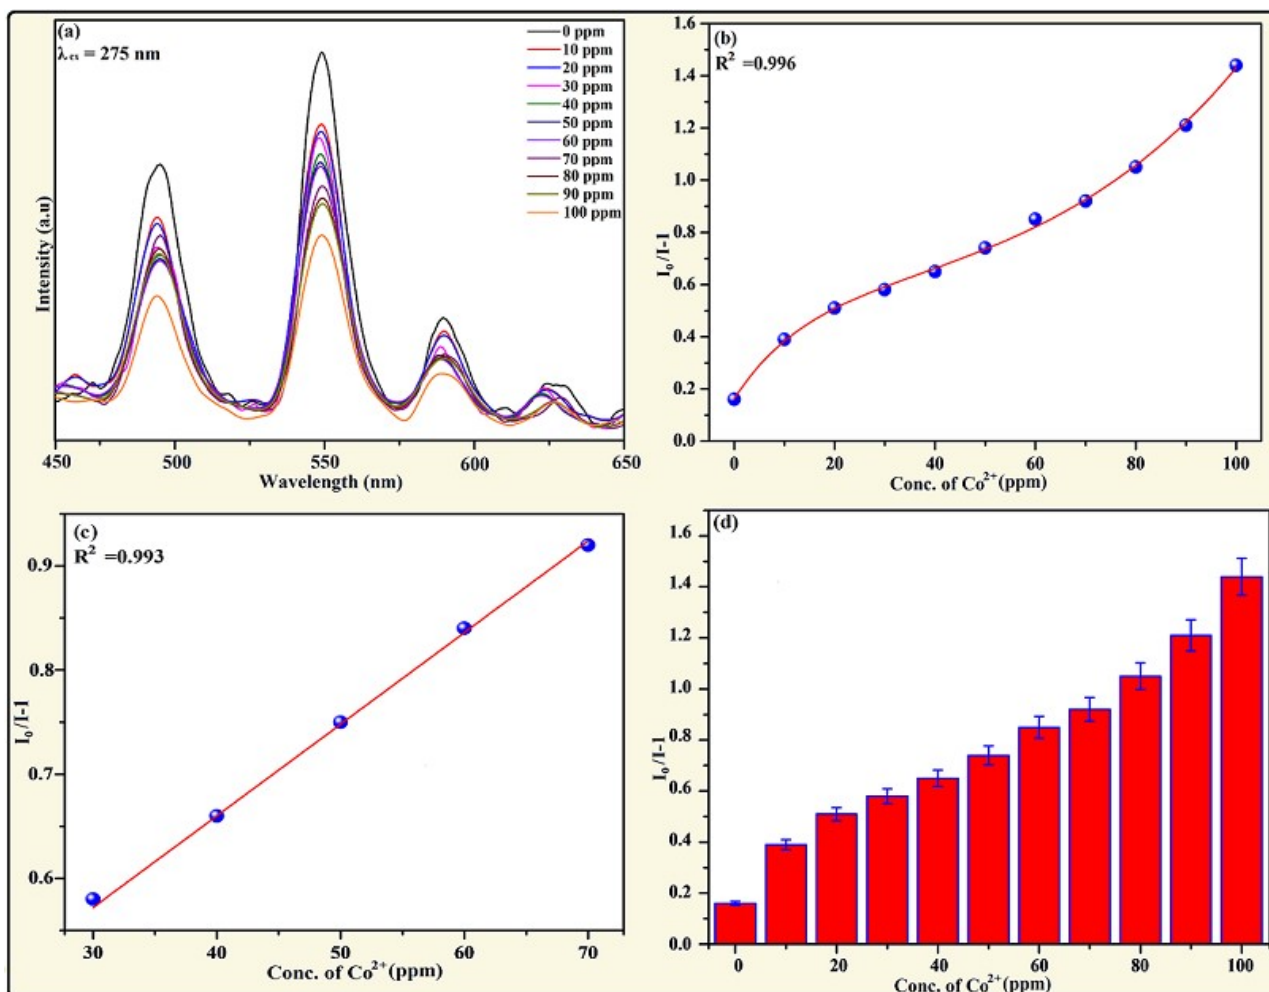

**Fig. S8†: ESI** Variation in photoluminescence intensity of designed chemosensor in presence of different  $\text{Co}^{2+}$  concentrations (from 0 to 100 ppm) selective excitation at  $\lambda_{\text{ex}} = 275 \text{ nm}$ : (a) Emission spectra of nanophosphors with addition of  $\text{Co}^{2+}$  ion (using water as solvent) (b) Nonlinear Stern-Volmer plot of  $I_0/I-1$  versus ( $\text{Co}^{2+}$ ) concentrations (c) linear Stern-Volmer fitting and (d) Error bar

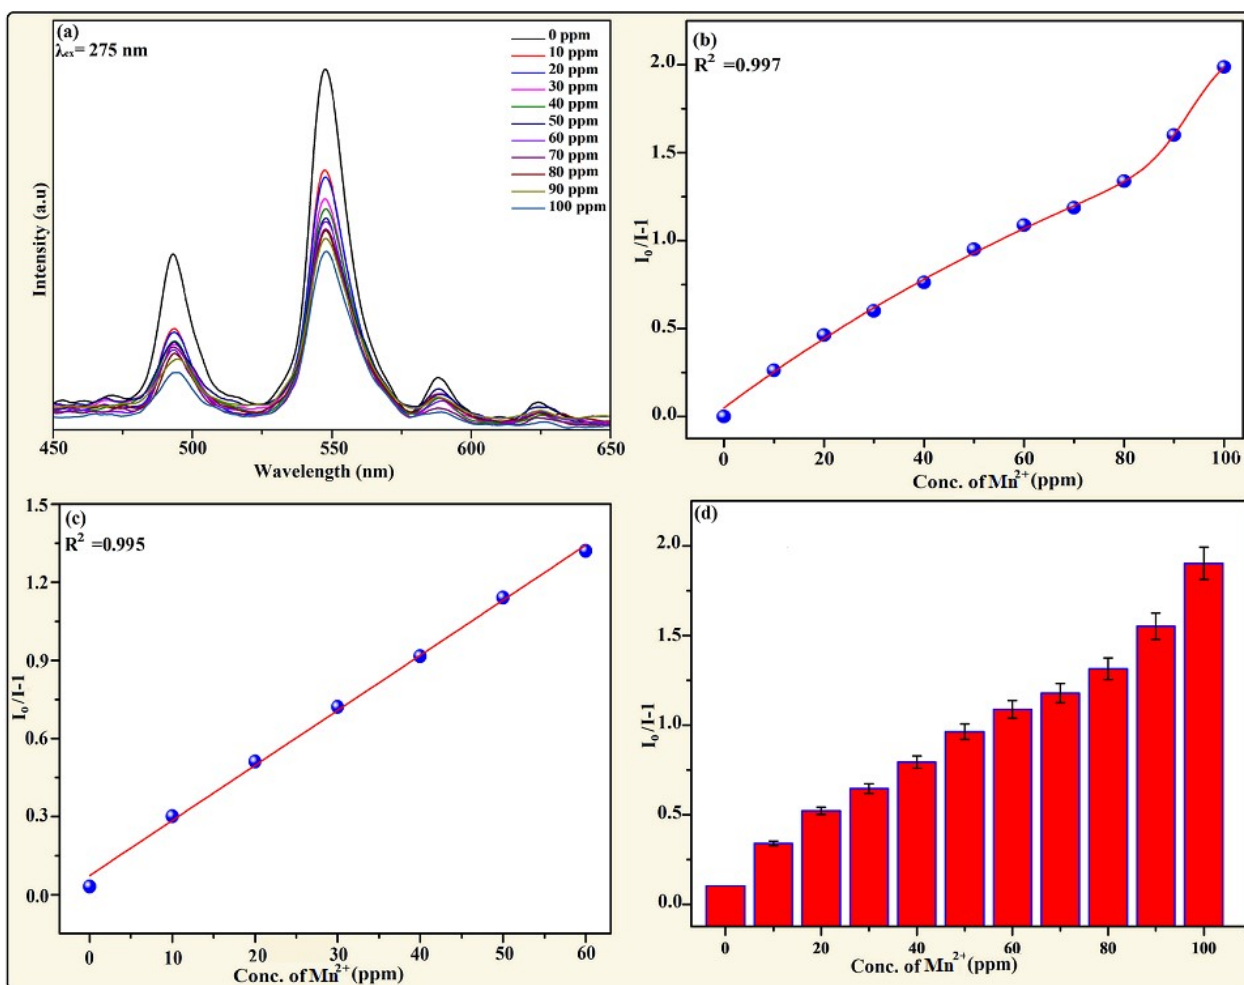

**Fig. S9†: ESI** Variation in photoluminescence intensity of designed chemosensor in presence of different Mn<sup>2+</sup> concentrations (from 0 to 100 ppm) selective excitation at  $\lambda_{ex} = 275$  nm (a) Emission spectra of nanophosphors with addition of Mn<sup>2+</sup> ion (using water as solvent) (b) Nonlinear Stern-Volmer plot of  $I_0/I-1$  versus (Mn<sup>2+</sup>) concentrations (c) linear Stern-Volmer fitting and (d) Error bar

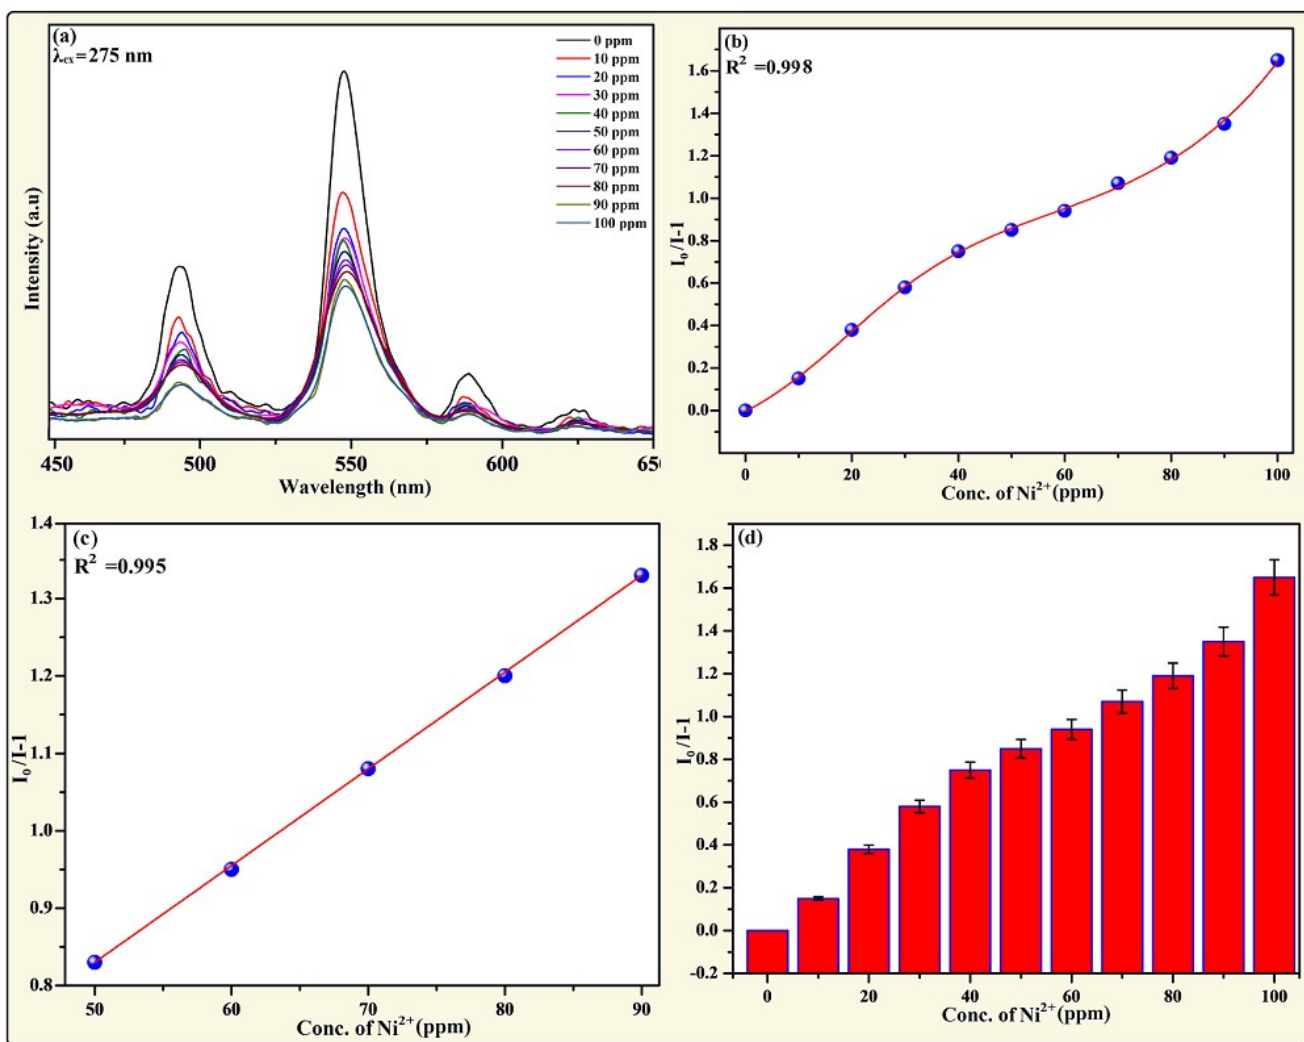

**Fig. S10†: ESI** Variation in photoluminescence intensity of designed chemosensor in presence of different Ni<sup>2+</sup> concentrations (from 0 to 100 ppm) selective excitation at  $\lambda_{ex} = 275$  nm (a) Emission spectra of nanophosphors with addition of Ni<sup>2+</sup> ion (using water as solvent) (b) Nonlinear Stern-Volmer plot of  $I_0/I-1$  versus (Ni<sup>2+</sup>) concentrations (c) linear Stern-Volmer fitting and (d) Error bar

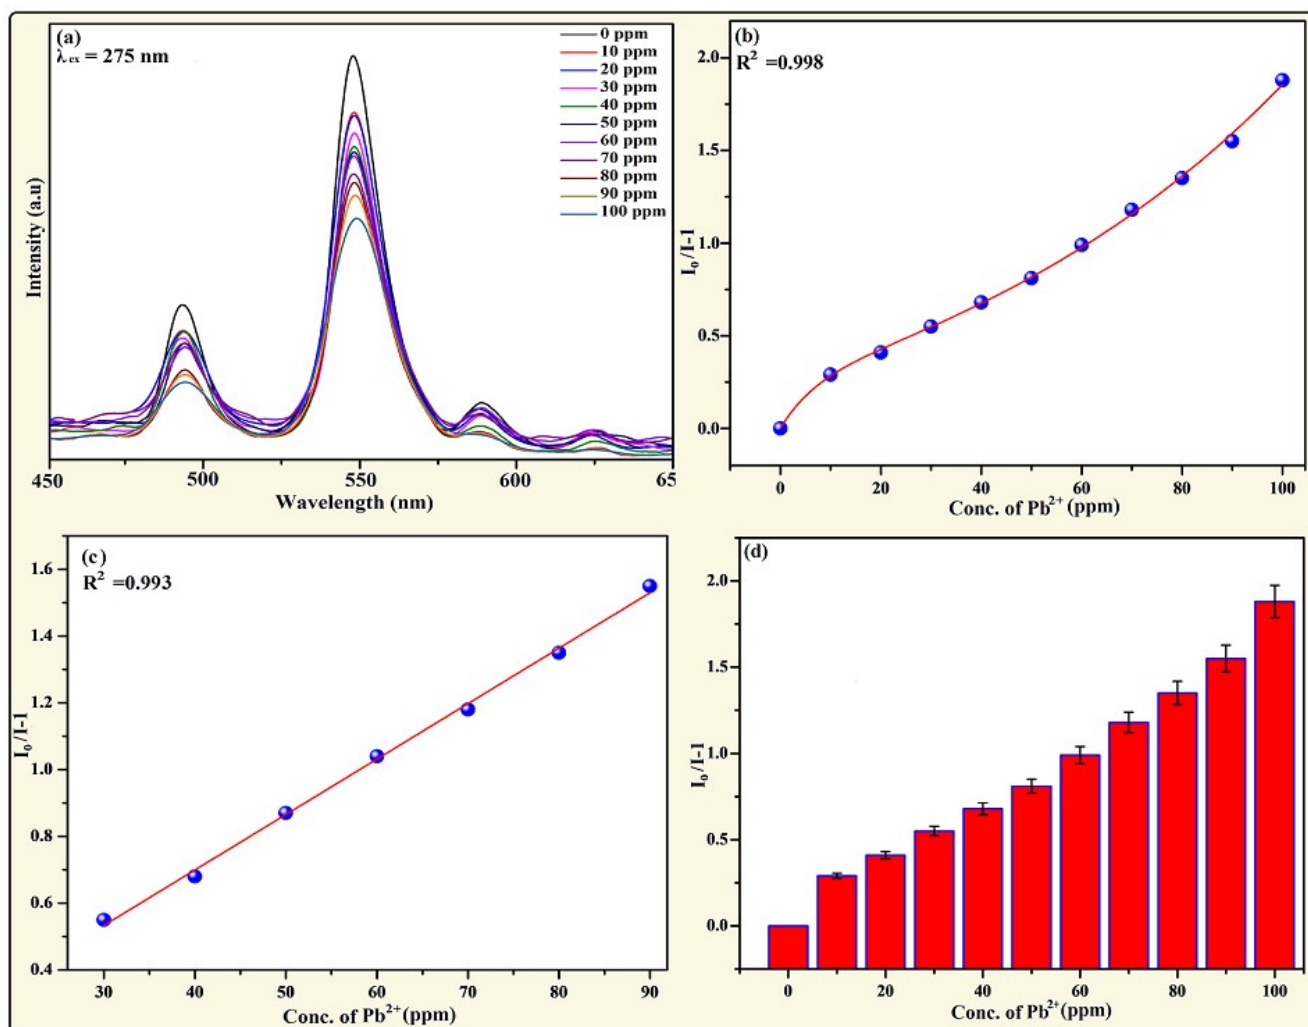

**Fig. S11†: ESI** Variation in photoluminescence intensity of designed chemosensor in presence of different Pb<sup>2+</sup> concentrations (from 0 to 100 ppm) selective excitation at  $\lambda_{ex} = 275$  nm: (a) Emission spectra of nanophosphors with addition of Pb<sup>2+</sup> ion (using water as solvent) (b) Nonlinear Stern-Volmer plot of  $I_0/I-1$  versus (Pb<sup>2+</sup>) concentrations (c) linear Stern-Volmer fitting and (d) Error bar

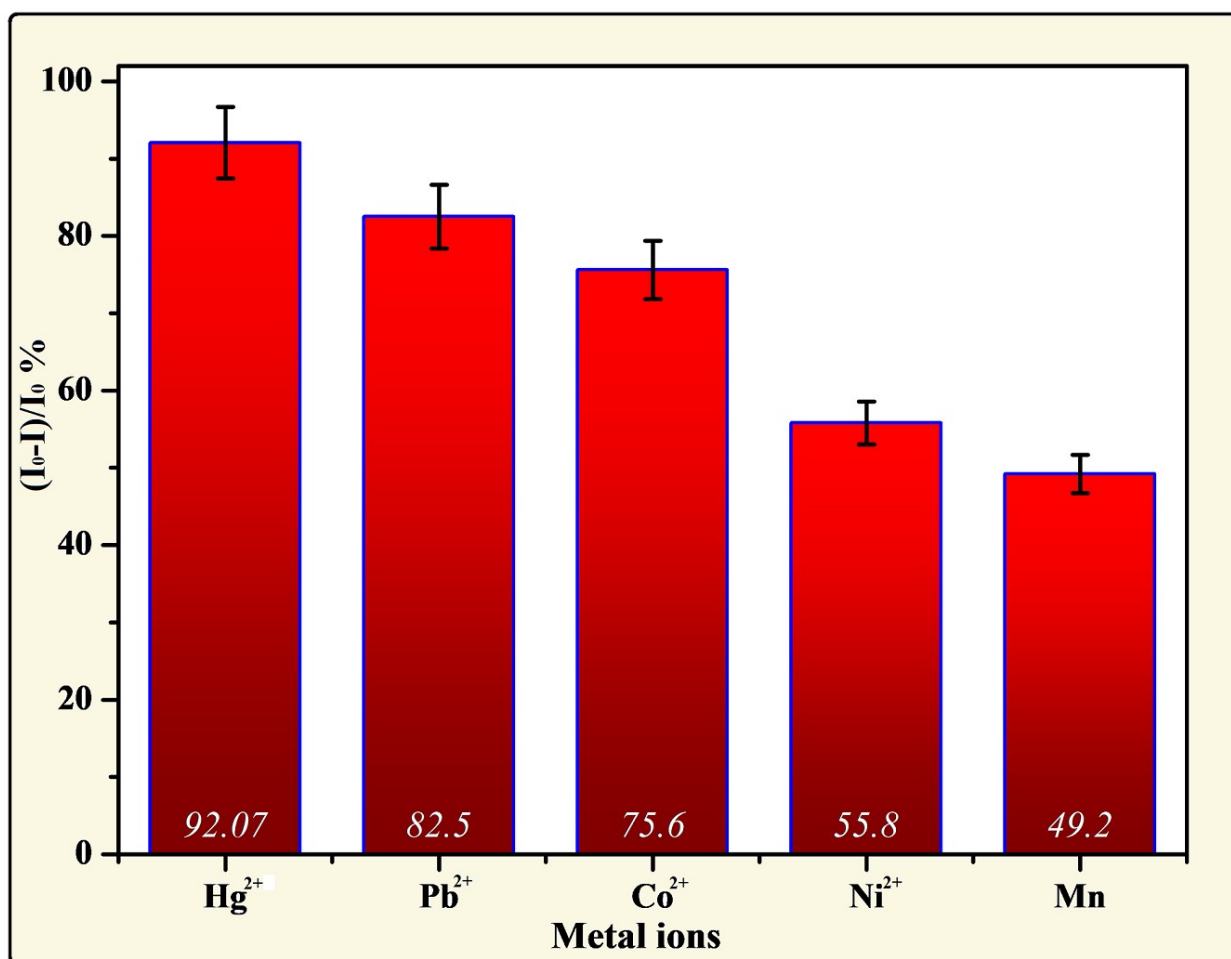

**Fig. S12†:** ESI Quenching efficiency of the prepared nanosensor in presence of different metals ions analytes (100 ppm) in aqueous medium.

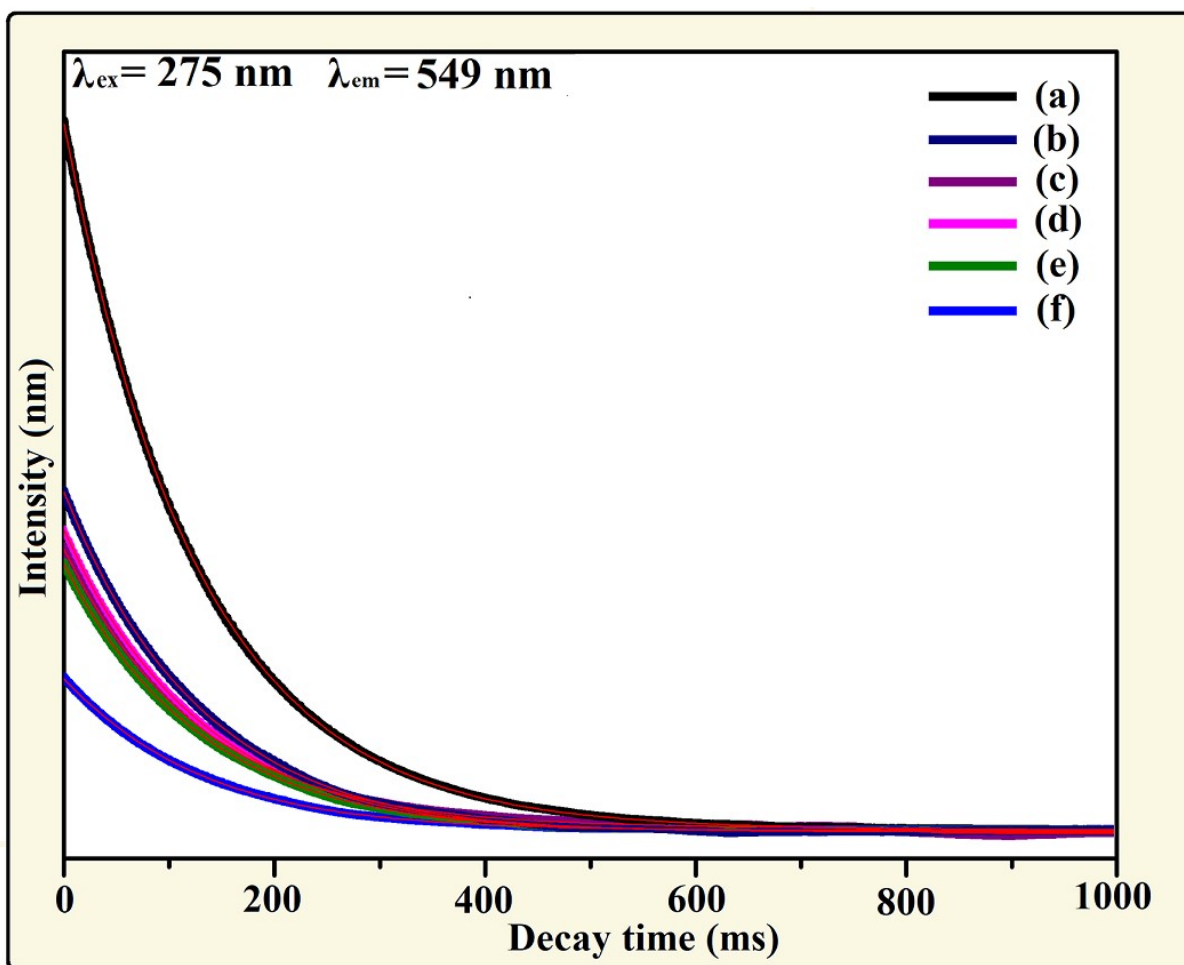

**Fig. S13†: ESI** Photoluminescence lifetime decay curves of as-fabricated nanosensor with addition of various toxic metal ions **(a)** blank nanosensor without addition of metal analyte **(b)** nanosensor with addition of  $\text{Mn}^{2+}$  (100 ppm) **(c)** nanosensor with addition of  $\text{Ni}^{2+}$  (100 ppm) **(d)** nanosensor with addition of  $\text{Co}^{2+}$  (100 ppm) **(e)** nanosensor with addition of  $\text{Pb}^{2+}$  (100 ppm) **(f)** nanosensor with addition of  $\text{Hg}^{2+}$  (100 ppm)

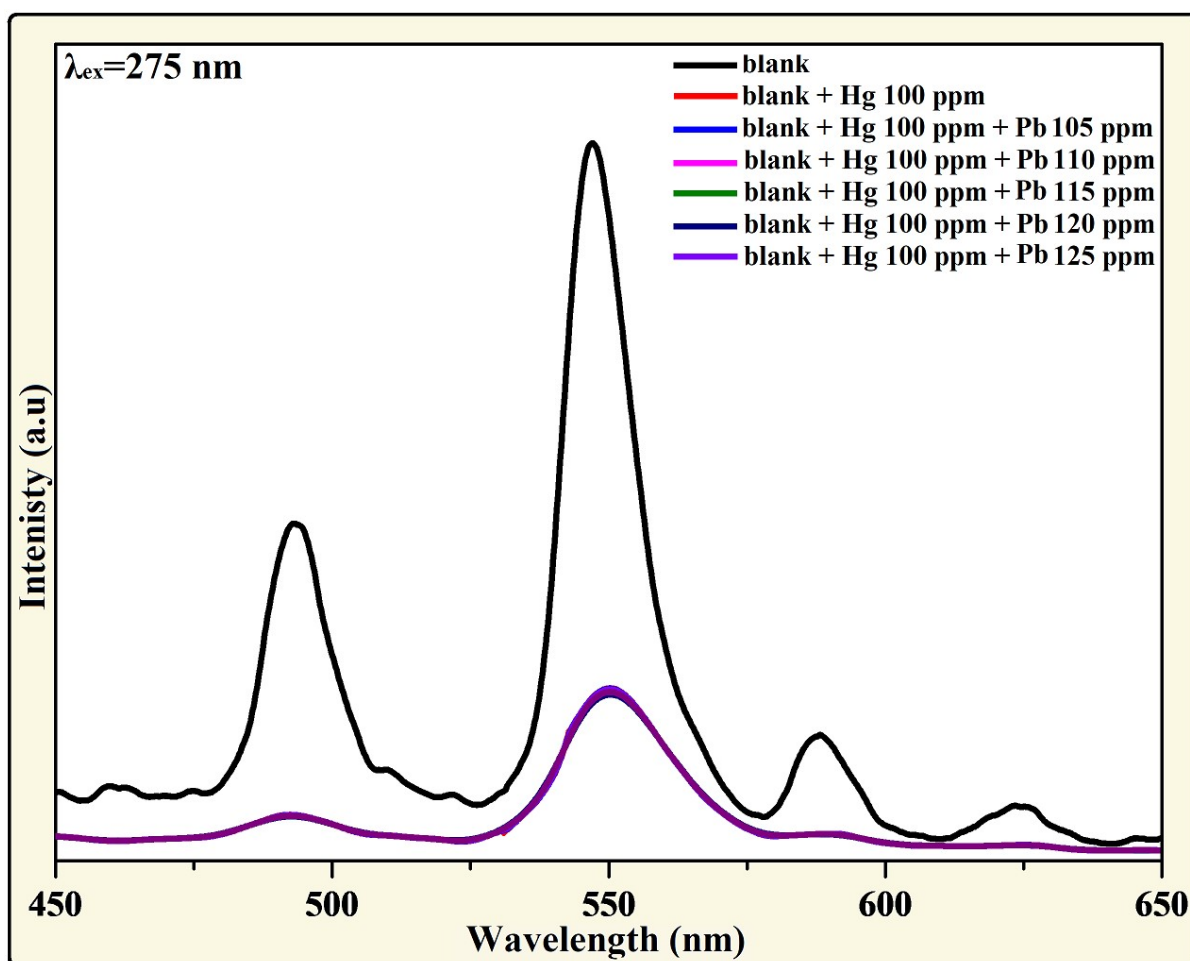

Fig. S14†: ESI Photoluminescence emission spectra of as-designed nanosensor with the addition of Hg<sup>2+</sup> ion and different concentrations of Pb<sup>2+</sup> ion.

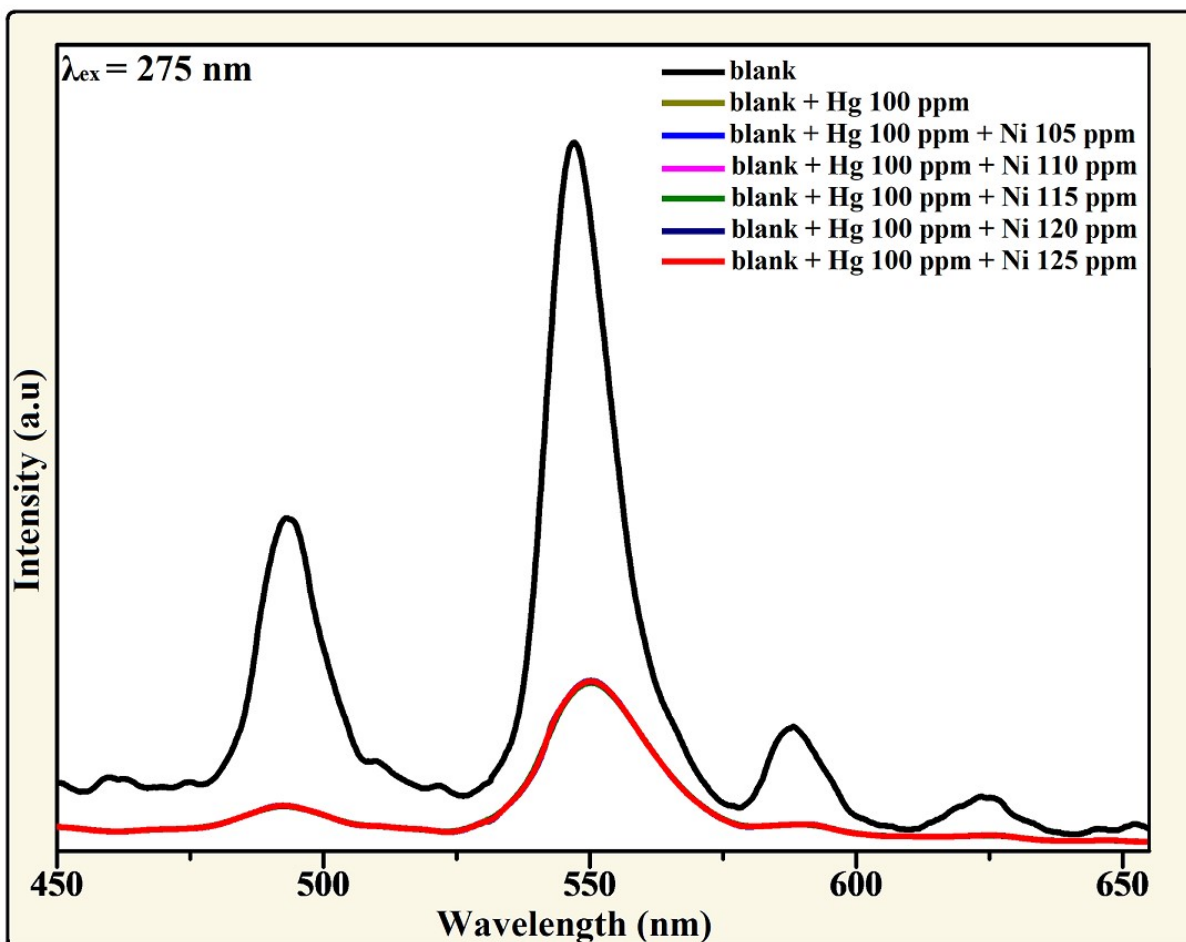

**Fig. S15†:** ESI Photoluminescence emission spectra of as-designed nanosensor after the addition of  $\text{Hg}^{2+}$  ion along with different concentrations of  $\text{Ni}^{2+}$  ion.



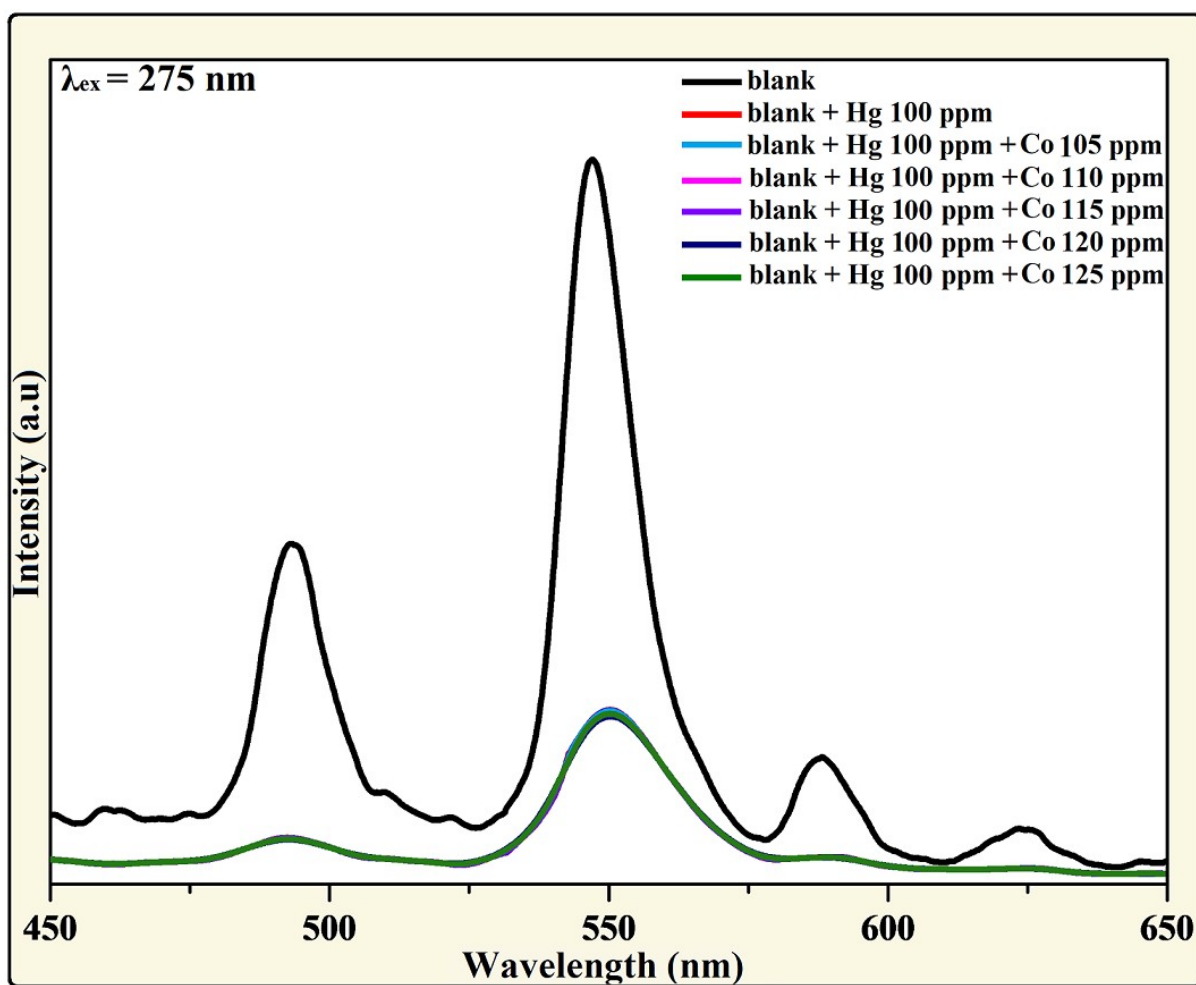

**Fig. S16†:** ESI Photoluminescence emission spectra of as-designed nanosensor with the addition of Hg<sup>2+</sup> ion and different concentrations of Co<sup>2+</sup> ion.

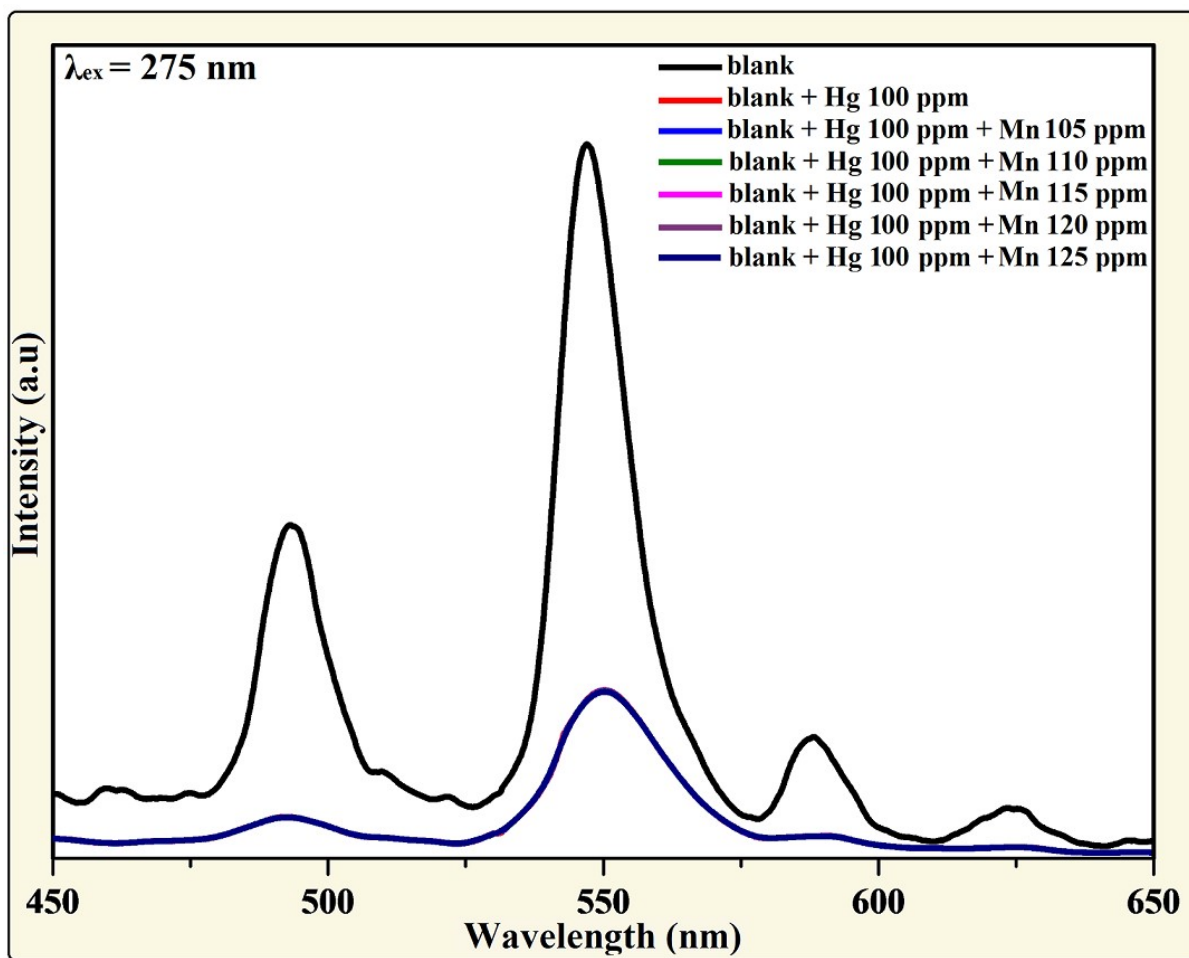

**Fig. S17†:** ESI Photoluminescence emission spectra of as-designed nanosensor with the addition of Hg<sup>2+</sup> ion and different concentrations of Mn<sup>2+</sup> ion.

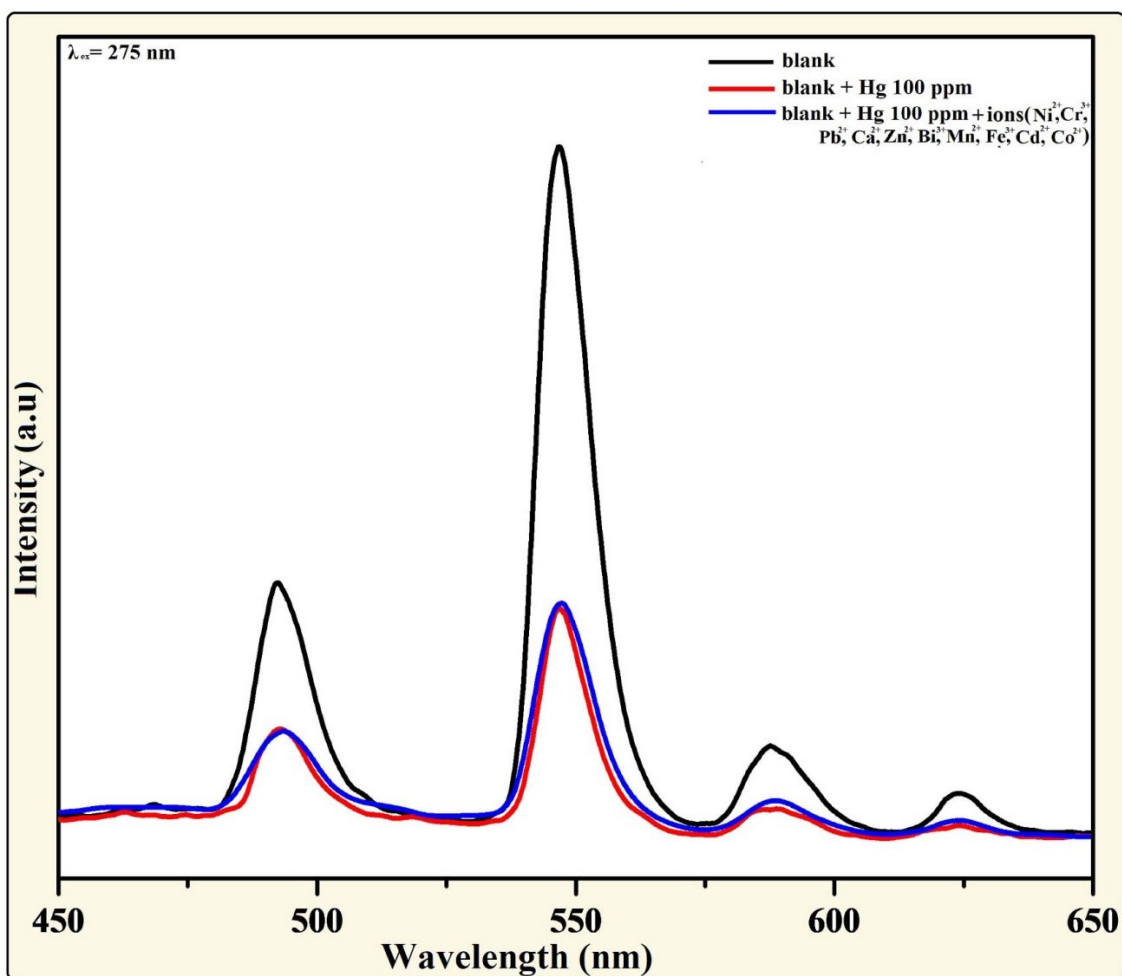

**Fig. S18†:** ESI Photoluminescence emission spectra of as-designed nanosensor with the addition of  $\text{Hg}^{2+}$  ion and presence of different metal ions.
